# Supplementary material for: Evaluation of Gene, Protein and Neurotrophin Expression in the Brain of Mice Exposed to Space Environment for 91 Days
Source: PLoS One. 2012 Jul 9;7(7):e40112. doi: 10.1371/journal.pone.0040112 (PMC3392276; doi:10.1371/journal.pone.0040112)
Supplement: Table S1 — Genes up-regulated by spaceflight (vs. ground control). (XLS) [file pone.0040112.s001.xls]

## Sheet: Sheet1
	Table S1: Genes up-regulated by spaceflight (vs. ground control)
Probe No.	Accession No.	Gene Comment	SF/GC
MmEG-0071	NM_030210	acetoacetyl-CoA synthetase (Aacs), mRNA	2.02
MmEG-0074	NM_153151	acetyl-Coenzyme A acetyltransferase 3 (Acat3), mRNA	3.04
MmEG-0079	NM_008553	achaete-scute complex homolog 1 (Drosophila) (Ascl1), mRNA	2.1
MmEG-0082	NM_019807	acid phosphatase, prostate (Acpp), transcript variant 2, mRNA	2.65
MmEG-0126	NM_053115	acyl-Coenzyme A oxidase 2, branched chain (Acox2), transcript variant 1, mRNA	2.25
MmEG-0134	NM_026887	adaptor-related protein complex 1, sigma 2 subunit (Ap1s2), mRNA	2.39
MmEG-0184	NM_007437	aldehyde dehydrogenase family 3, subfamily A2 (Aldh3a2), mRNA	2.41
MmEG-0198	NM_013778	aldo-keto reductase family 1, member C13 (Akr1c13), mRNA	2.44
MmEG-0218	NM_007423	alpha fetoprotein (Afp), mRNA	2.05
MmEG-0301	NM_139206	ArfGAP with RhoGAP domain, ankyrin repeat and PH domain 3 (Arap3), mRNA	2.13
MmEG-0317	NM_009709	aryl hydrocarbon receptor nuclear translocator (Arnt), transcript variant 2, mRNA	2.13
MmEG-0343	NM_025504	ATP5S-like (Atp5sl), mRNA	2.11
MmEG-0405	NM_177584	B and T lymphocyte associated (Btla), transcript variant 2, mRNA	2.15
MmEG-0443	NM_008081	beta-1,4-N-acetyl-galactosaminyl transferase 2 (B4galnt2), mRNA	2.37
MmEG-0467	NM_009757	bone morphogenetic protein 15 (Bmp15), mRNA	2.25
MmEG-0489	NM_178309	BRCA1 interacting protein C-terminal helicase 1 (Brip1), mRNA	2.47
MmEG-0506	NM_009594	c-abl oncogene 1, receptor tyrosine kinase (Abl1), transcript variant 2, mRNA	2.32
MmEG-0530	NM_007601	calpain 3 (Capn3), transcript variant a, mRNA	2.32
MmEG-0596	NM_007788	casein kinase 2, alpha 1 polypeptide (Csnk2a1), mRNA	2.22
MmEG-0598	NM_027937	CASK interacting protein 1 (Caskin1), mRNA	2.26
MmEG-0624	NM_177662	cathepsin O (Ctso), mRNA	2.16
MmEG-0643	NM_007639	CD1d1 antigen (Cd1d1), mRNA	3.52
MmEG-0660	NM_009851	CD44 antigen (Cd44), transcript variant 1, mRNA	2.28
MmEG-0726	NM_145825	centrin 4 (Cetn4), mRNA	2.19
MmEG-0755	NM_009137	chemokine (C-C motif) ligand 22 (Ccl22), mRNA	2.14
MmEG-0764	NM_013654	chemokine (C-C motif) ligand 7 (Ccl7), mRNA	2.13
MmEG-0775	NM_007720	chemokine (C-C motif) receptor 8 (Ccr8), mRNA	2.03
MmEG-0820	NM_026014	chromatin licensing and DNA replication factor 1 (Cdt1), mRNA	2.08
MmEG-0842	NM_009903	claudin 4 (Cldn4), mRNA	2.06
MmEG-0866	NM_007735	collagen, type IV, alpha 4 (Col4a4), mRNA	2.2
MmEG-0967	NM_016746	cyclin C (Ccnc), transcript variant 1, mRNA	2.3
MmEG-1003	NM_130860	cyclin-dependent kinase 9 (CDC2-related kinase) (Cdk9), mRNA	2.53
MmEG-1009	NM_007671	cyclin-dependent kinase inhibitor 2C (p18, inhibits CDK4) (Cdkn2c), mRNA	2.15
MmEG-1054	NM_007809	cytochrome P450, family 17, subfamily a, polypeptide 1 (Cyp17a1), mRNA	2.76
MmEG-1063	NM_010002	cytochrome P450, family 2, subfamily c, polypeptide 38 (Cyp2c38), mRNA	2.45
MmEG-1091	NM_007818	cytochrome P450, family 3, subfamily a, polypeptide 11 (Cyp3a11), mRNA	2.33
MmEG-1101	NM_007822	cytochrome P450, family 4, subfamily a, polypeptide 14 (Cyp4a14), mRNA	2.31
MmEG-1110	NM_010012	cytochrome P450, family 8, subfamily b, polypeptide 1 (Cyp8b1), mRNA	2.34
MmEG-1136	NM_007827	decay accelerating factor 2 (Daf2), mRNA	2
MmEG-1176	NM_198114	diacylglycerol lipase, alpha (Dagla), mRNA	2.04
MmEG-1226	NM_013810	drebrin-like (Dbnl), transcript variant 2, mRNA	2.07
MmEG-1262	NM_028133	EGL nine homolog 3 (C. elegans) (Egln3), mRNA	2.76
MmEG-1264	NM_023479	elaC homolog 2 (E. coli) (Elac2), mRNA	2.25
MmEG-1275	NM_172573	endo-beta-N-acetylglucosaminidase (Engase), mRNA	2.26
MmEG-1286	NM_199307	endothelin converting enzyme 1 (Ece1), mRNA	2.15
MmEG-1335	NM_010121	eukaryotic translation initiation factor 2 alpha kinase 3 (Eif2ak3), mRNA	2.11
MmEG-1372	NM_010167	eyes absent 4 homolog (Drosophila) (Eya4), mRNA	2.52
MmEG-1378	NM_144526	family with sequence similarity 64, member A (Fam64a), mRNA	2.26
MmEG-1534	NM_017369	gamma-aminobutyric acid (GABA) A receptor, subunit epsilon (Gabre), mRNA	2.93
MmEG-1683	NM_008109	growth differentiation factor 5 (Gdf5), mRNA	2.11
MmEG-1734	NM_024441	heat shock protein 2 (Hspb2), transcript variant 1, mRNA	2.34
MmEG-1759	NM_019424	Hermansky-Pudlak syndrome 1 homolog (human) (Hps1), mRNA	2
MmEG-1765	NM_173371	hexose-6-phosphate dehydrogenase (glucose 1-dehydrogenase) (H6pd), mRNA	2.17
MmEG-1807	NM_008269	homeo box B6 (Hoxb6), mRNA	3.56
MmEG-1828	NM_008293	hydroxy-delta-5-steroid dehydrogenase, 3 beta- and steroid delta-isomerase 1 (Hsd3b1), mRNA	2.24
MmEG-1836	NM_025330	hydroxysteroid (17-beta) dehydrogenase 14 (Hsd17b14), mRNA	2
MmEG-1850	NM_015790	icos ligand (Icosl), mRNA	2.1
MmEG-1901	NM_178632	integrator complex subunit 7 (Ints7), mRNA	2.33
MmEG-1938	NM_010507	interferon alpha 9 (Ifna9), mRNA	2.52
MmEG-1943	NM_023065	interferon gamma inducible protein 30 (Ifi30), mRNA	2.29
MmEG-1971	NM_008361	interleukin 1 beta (Il1b), mRNA	2.31
MmEG-2005	NM_010552	interleukin 17A (Il17a), mRNA	2.22
MmEG-2019	NM_172786	interleukin 20 receptor, alpha (Il20ra), mRNA	2.39
MmEG-2045	NM_178241	interleukin 8 receptor, alpha (Il8ra), mRNA	2.02
MmEG-2118	NM_010637	Kruppel-like factor 4 (gut) (Klf4), mRNA	2.31
MmEG-2120	NM_133809	kynurenine 3-monooxygenase (kynurenine 3-hydroxylase) (Kmo), mRNA	2.28
MmEG-2160	NM_013532	leukocyte immunoglobulin-like receptor, subfamily B, member 4 (Lilrb4), mRNA	2.4
MmEG-2244	NM_001003893	mannan-binding lectin serine peptidase 2 (Masp2), transcript variant 1, mRNA	2.36
MmEG-2283	NM_013599	matrix metallopeptidase 9 (Mmp9), mRNA	2.47
MmEG-2309	NM_027209	membrane-spanning 4-domains, subfamily A, member 6B (Ms4a6b), mRNA	2.53
MmEG-2312	NM_027836	membrane-spanning 4-domains, subfamily A, member 7 (Ms4a7), transcript variant 1, mRNA	2.4
MmEG-2338	NM_176917	methyltransferase like 4 (Mettl4), mRNA	2.25
MmEG-2343	NM_008546	microfibrillar-associated protein 2 (Mfap2), transcript variant 1, mRNA	2.03
MmEG-2349	NM_177282	microtubule associated monoxygenase, calponin and LIM domain containing 2 (Mical2), mRNA	2.69
MmEG-2390	NM_008928	mitogen-activated protein kinase kinase 3 (Map2k3), mRNA	3.54
MmEG-2394	NM_009582	mitogen-activated protein kinase kinase kinase 12 (Map3k12), transcript variant 2, mRNA	2.08
MmEG-2455	NM_010874	N-acetyltransferase 2 (arylamine N-acetyltransferase) (Nat2), mRNA	2.24
MmEG-2549	NM_008699	NK2 transcription factor related, locus 3 (Drosophila) (Nkx2-3), mRNA	2.42
MmEG-2570	NM_010928	Notch gene homolog 2 (Drosophila) (Notch2), mRNA	2.09
MmEG-2620	NM_146652	olfactory receptor 13 (Olfr13), mRNA	2.28
MmEG-2656	NM_008782	paired box gene 5 (Pax5), mRNA	2.91
MmEG-2739	NM_020035	phosphatidylinositol glycan anchor biosynthesis, class O (Pigo), mRNA	2.11
MmEG-2758	NM_008802	phosphodiesterase 7A (Pde7a), transcript variant 1, mRNA	2.48
MmEG-2774	NM_023129	phospholamban (Pln), transcript variant 2, mRNA	2.13
MmEG-2857	NM_198600	polymerase (DNA directed) sigma (Pols), mRNA	2.06
MmEG-2898	NM_138659	pre-mRNA processing factor 8 (Prpf8), mRNA	2.74
MmEG-2930	NM_197945	ProSAPiP1 protein (Prosapip1), mRNA	2.34
MmEG-2977	NM_011159	protein kinase, DNA activated, catalytic polypeptide (Prkdc), mRNA	2.18
MmEG-3006	NM_008981	protein tyrosine phosphatase, receptor type, G (Ptprg), mRNA	3.31
MmEG-3044	NM_133686	quinolinate phosphoribosyltransferase (Qprt), mRNA	2.7
MmEG-3129	NM_020022	replication factor C (activator 1) 2 (Rfc2), mRNA	2.03
MmEG-3157	NM_133832	retinol dehydrogenase 10 (all-trans) (Rdh10), mRNA	2.04
MmEG-3193	NM_012052	ribosomal protein S3 (Rps3), mRNA	2.02
MmEG-3195	NM_028259	ribosomal protein S6 kinase, polypeptide 1 (Rps6kb1), transcript variant 2, mRNA	2.57
MmEG-3238	NM_021414	S-adenosylhomocysteine hydrolase-like 2 (Ahcyl2), mRNA	2.01
MmEG-3247	NM_011407	schlafen 1 (Slfn1), mRNA	2.55
MmEG-3280	NM_011467	sepiapterin reductase (Spr), mRNA	2.46
MmEG-3295	NM_009247	serine (or cysteine) peptidase inhibitor, clade A, member 1E (Serpina1e), mRNA	2.14
MmEG-3297	NM_008458	serine (or cysteine) peptidase inhibitor, clade A, member 3C (Serpina3c), mRNA	2.2
MmEG-3304	NM_201376	serine (or cysteine) peptidase inhibitor, clade B (ovalbumin), member 3D (Serpinb3d), mRNA	2.2
MmEG-3314	NM_013761	serine racemase (Srr), transcript variant 1, mRNA	2.45
MmEG-3325	NM_011315	serum amyloid A 3 (Saa3), mRNA	2.03
MmEG-3388	NM_133648	solute carrier family 12, member 6 (Slc12a6), transcript variant 1, mRNA	2.26
MmEG-3407	NM_011396	solute carrier family 22 (organic cation transporter), member 5 (Slc22a5), mRNA	2.36
MmEG-3438	NM_019810	solute carrier family 5 (sodium/glucose cotransporter), member 1 (Slc5a1), mRNA	2.27
MmEG-3442	NM_010020	solute carrier family 6 (neurotransmitter transporter, dopamine), member 3 (Slc6a3), mRNA	2.22
MmEG-3458	NM_019973	Son DNA binding protein (Son), transcript variant 2, mRNA	2.23
MmEG-3482	NM_144792	sphingomyelin synthase 1 (Sgms1), mRNA	2.09
MmEG-3490	NM_011518	spleen tyrosine kinase (Syk), mRNA	2.36
MmEG-3498	NM_026499	splicing factor, arginine/serine-rich 6 (Sfrs6), mRNA	2.08
MmEG-3499	NM_133903	spondin 2, extracellular matrix protein (Spon2), mRNA	2.02
MmEG-3576	NM_001003972	SUMO1/sentrin specific peptidase 7 (Senp7), transcript variant 3, mRNA	2.48
MmEG-3586	NM_080843	suppressor of cytokine signaling 4 (Socs4), mRNA	2.62
MmEG-3588	NM_018821	suppressor of cytokine signaling 6 (Socs6), mRNA	2.68
MmEG-3607	NM_021382	tachykinin receptor 3 (Tacr3), mRNA	2.59
MmEG-3615	NM_019507	T-box 21 (Tbx21), mRNA	2.45
MmEG-3634	NM_175646	thioredoxin-like 4B (Txnl4b), mRNA	2.23
MmEG-3639	NM_009379	thrombopoietin (Thpo), mRNA	2.37
MmEG-3685	NM_031178	toll-like receptor 9 (Tlr9), mRNA	2.21
MmEG-3715	NM_020601	transducin (beta)-like 1 X-linked (Tbl1x), mRNA	2.26
MmEG-3720	NM_013735	transformation related protein 53 binding protein 1 (Trp53bp1), mRNA	2.08
MmEG-3778	NM_013835	TROVE domain family, member 2 (Trove2), mRNA	2.85
MmEG-3844	NM_010633	U2AF homology motif (UHM) kinase 1 (Uhmk1), mRNA	2.8
MmEG-3874	NM_172881	UDP glucuronosyltransferase 2 family, polypeptide B35 (Ugt2b35), mRNA	2.14
MmEG-3973	NM_010747	Yamaguchi sarcoma viral (v-yes-1) oncogene homolog (Lyn), transcript variant 2, mRNA	2.06
	SF and GC are spaceflight and ground control.
