# Supplementary material for: Evaluation of Gene, Protein and Neurotrophin Expression in the Brain of Mice Exposed to Space Environment for 91 Days
Source: PLoS One. 2012 Jul 9;7(7):e40112. doi: 10.1371/journal.pone.0040112 (PMC3392276; doi:10.1371/journal.pone.0040112)
Supplement: Table S2 — Genes down-regulated by spaceflight (vs. ground control). (XLS) [file pone.0040112.s002.xls]

## Sheet: Sheet1
	Table S2: Genes down-regulated by spaceflight (vs. ground control)
Probe No.	Accession No.	Gene Comment	SF/GC
MmEG-0037	NM_011851	5' nucleotidase, ecto (Nt5e), mRNA	0.33
MmEG-0053	NM_007399	a disintegrin and metallopeptidase domain 10 (Adam10), mRNA	0.47
MmEG-0091	NM_009716	activating transcription factor 4 (Atf4), mRNA	0.45
MmEG-0095	NM_053178	acyl-CoA synthetase bubblegum family member 1 (Acsbg1), mRNA	0.43
MmEG-0128	NM_012054	acyloxyacyl hydrolase (Aoah), mRNA	0.29
MmEG-0160	NM_013462	adrenergic receptor, beta 3 (Adrb3), mRNA	0.32
MmEG-0268	NM_009692	apolipoprotein A-I (Apoa1), mRNA	0.19
MmEG-0340	NM_016774	ATP synthase, H+ transporting mitochondrial F1 complex, beta subunit (Atp5b), nuclear gene encoding mitochondrial protein, mRNA	0.43
MmEG-0342	NM_020615	ATP synthase, H+ transporting, mitochondrial F1 complex, gamma polypeptide 1 (Atp5c1), nuclear gene encoding mitochondrial protein, transcript variant 1, mRNA	0.49
MmEG-0344	NM_027435	ATPase family, AAA domain containing 2 (Atad2), mRNA	0.3
MmEG-0368	NM_144900	ATPase, Na+/K+ transporting, alpha 1 polypeptide (Atp1a1), mRNA	0.42
MmEG-0397	NM_009646	autoimmune regulator (autoimmune polyendocrinopathy candidiasis ectodermal dystrophy) (Aire), mRNA	0.46
MmEG-0444	NM_009735	beta-2 microglobulin (B2m), mRNA	0.46
MmEG-0468	NM_007553	bone morphogenetic protein 2 (Bmp2), mRNA	0.42
MmEG-0481	NM_018819	brain protein 44-like (Brp44l), mRNA	0.42
MmEG-0513	NM_009788	calbindin 1 (Calb1), mRNA	0.45
MmEG-0532	NM_009795	calpain, small subunit 1 (Capns1), mRNA	0.47
MmEG-0557	NM_009801	carbonic anhydrase 2 (Car2), mRNA	0.46
MmEG-0563	NM_007592	carbonic anhydrase 8 (Car8), mRNA	0.26
MmEG-0676	NM_133655	CD81 antigen (Cd81), mRNA	0.47
MmEG-0725	NM_007684	centrin 3 (Cetn3), mRNA	0.46
MmEG-0729	NM_145475	ceramide kinase (Cerk), mRNA	0.38
MmEG-0921	NM_021273	creatine kinase, brain (Ckb), mRNA	0.44
MmEG-0978	NM_007635	cyclin G2 (Ccng2), mRNA	0.46
MmEG-0980	NM_017367	cyclin I (Ccni), mRNA	0.45
MmEG-1036	NM_009941	cytochrome c oxidase subunit IV isoform 1 (Cox4i1), mRNA	0.48
MmEG-1044	NM_009945	cytochrome c oxidase, subunit VIIa 2 (Cox7a2), mRNA	0.49
MmEG-1048	NM_025567	cytochrome c-1 (Cyc1), mRNA	0.45
MmEG-1122	NM_011873	DAZ associated protein 2 (Dazap2), mRNA	0.49
MmEG-1149	NM_007853	degenerative spermatocyte homolog 1 (Drosophila) (Degs1), mRNA	0.4
MmEG-1166	NM_009345	deoxynucleotidyltransferase, terminal (Dntt), transcript variant 1, mRNA	0.43
MmEG-1168	NM_019957	deoxyribonuclease II beta (Dnase2b), mRNA	0.49
MmEG-1179	NM_007830	diazepam binding inhibitor (Dbi), transcript variant 2, mRNA	0.41
MmEG-1221	NM_007875	dolichyl-phosphate (UDP-N-acetylglucosamine) acetylglucosaminephosphotransferase 1 (GlcNAc-1-P transferase) (Dpagt1), mRNA	0.42
MmEG-1272	NM_021876	embryonic ectoderm development (Eed), mRNA	0.49
MmEG-1293	NM_026728	enoyl Coenzyme A hydratase domain containing 2 (Echdc2), mRNA	0.38
MmEG-1334	NM_007907	eukaryotic translation elongation factor 2 (Eef2), mRNA	0.46
MmEG-1371	NM_010166	eyes absent 3 homolog (Drosophila) (Eya3), transcript variant 2, mRNA	0.44
MmEG-1381	NM_134469	farnesyl diphosphate synthetase (Fdps), mRNA	0.48
MmEG-1395	NM_021272	fatty acid binding protein 7, brain (Fabp7), mRNA	0.45
MmEG-1399	NM_010234	FBJ osteosarcoma oncogene (Fos), mRNA	0.4
MmEG-1462	NM_008593	forkhead box D2 (Foxd2), mRNA	0.41
MmEG-1483	NM_019395	fructose bisphosphatase 1 (Fbp1), mRNA	0.4
MmEG-1489	NM_025799	fucosidase, alpha-L- 2, plasma (Fuca2), mRNA	0.38
MmEG-1533	NM_010250	gamma-aminobutyric acid (GABA) A receptor, subunit alpha 1 (Gabra1), mRNA	0.45
MmEG-1592	NM_008129	glutamate-cysteine ligase, modifier subunit (Gclm), mRNA	0.49
MmEG-1716	NM_012015	H2A histone family, member Y (H2afy), transcript variant 1, mRNA	0.45
MmEG-1718	NM_008210	H3 histone, family 3A (H3f3a), mRNA	0.49
MmEG-1742	NM_010480	heat shock protein 90, alpha (cytosolic), class A member 1 (Hsp90aa1), mRNA	0.47
MmEG-1868	NM_008321	inhibitor of DNA binding 3 (Id3), mRNA	0.42
MmEG-2011	NM_008365	interleukin 18 receptor 1 (Il18r1), transcript variant 1, mRNA	0.43
MmEG-2065	NM_130884	isocitrate dehydrogenase 3 (NAD+) beta (Idh3b), nuclear gene encoding mitochondrial protein, mRNA	0.49
MmEG-2103	NM_011317	KH domain containing, RNA binding, signal transduction associated 1 (Khdrbs1), mRNA	0.48
MmEG-2122	NM_008492	lactate dehydrogenase B (Ldhb), mRNA	0.47
MmEG-2149	NM_024434	leucine aminopeptidase 3 (Lap3), mRNA	0.48
MmEG-2178	NM_007947	lipocalin 5 (Lcn5), transcript variant 1, mRNA	0.33
MmEG-2218	NM_053092	lysyl-tRNA synthetase (Kars), transcript variant 2, mRNA	0.49
MmEG-2222	NM_010798	macrophage migration inhibitory factor (Mif), mRNA	0.47
MmEG-2235	NM_008618	malate dehydrogenase 1, NAD (soluble) (Mdh1), mRNA	0.41
MmEG-2279	NM_010808	matrix metallopeptidase 24 (Mmp24), mRNA	0.42
MmEG-2323	NM_133653	methionine adenosyltransferase I, alpha (Mat1a), mRNA	0.27
MmEG-2330	NM_138745	methylenetetrahydrofolate dehydrogenase (NADP+ dependent), methenyltetrahydrofolate cyclohydrolase, formyltetrahydrofolate synthase (Mthfd1), mRNA	0.46
MmEG-2368	NM_025993	MIS12 homolog (yeast) (Mis12), mRNA	0.36
MmEG-2370	NM_026310	mitochondrial ribosomal protein L18 (Mrpl18), nuclear gene encoding mitochondrial protein, mRNA	0.46
MmEG-2468	NM_025987	NADH dehydrogenase (ubiquinone) 1 alpha subcomplex, 6 (B14) (Ndufa6), nuclear gene encoding mitochondrial protein, mRNA	0.46
MmEG-2472	NM_026061	NADH dehydrogenase (ubiquinone) 1 beta subcomplex 8 (Ndufb8), mRNA	0.48
MmEG-2473	NM_026684	NADH dehydrogenase (ubiquinone) 1 beta subcomplex, 10 (Ndufb10), mRNA	0.44
MmEG-2510	NM_008675	neuroblastoma, suppression of tumorigenicity 1 (Nbl1), mRNA	0.47
MmEG-2515	NM_010894	neurogenic differentiation 1 (Neurod1), mRNA	0.31
MmEG-2526	NM_008745	neurotrophic tyrosine kinase, receptor, type 2 (Ntrk2), transcript variant 2, mRNA	0.49
MmEG-2558	NM_019730	non-metastatic cells 3, protein expressed in (Nme3), mRNA	0.45
MmEG-2602	NM_008722	nucleophosmin 1 (Npm1), mRNA	0.46
MmEG-2652	NM_011035	p21 protein (Cdc42/Rac)-activated kinase 1 (Pak1), mRNA	0.49
MmEG-2659	NM_011091	paired-Ig-like receptor A4 (Pira4), mRNA	0.27
MmEG-2673	NM_019695	par-6 (partitioning defective 6,) homolog alpha (C. elegans) (Pard6a), transcript variant 1, mRNA	0.29
MmEG-2695	NM_008907	peptidylprolyl isomerase A (Ppia), mRNA	0.46
MmEG-2708	NM_012021	peroxiredoxin 5 (Prdx5), nuclear gene encoding mitochondrial protein, mRNA	0.44
MmEG-2771	NM_023418	phosphoglycerate mutase 1 (Pgam1), mRNA	0.49
MmEG-2807	NM_025939	phosphoribosylaminoimidazole carboxylase, phosphoribosylaminoribosylaminoimidazole, succinocarboxamide synthetase (Paics), mRNA	0.49
MmEG-2810	NM_172783	phosphorylase kinase alpha 2 (Phka2), mRNA	0.46
MmEG-2815	NM_010726	phytanoyl-CoA hydroxylase (Phyh), mRNA	0.47
MmEG-2828	NM_008808	platelet derived growth factor, alpha (Pdgfa), mRNA	0.42
MmEG-2852	NM_021568	poly(rC) binding protein 3 (Pcbp3), mRNA	0.35
MmEG-2863	NM_009085	polymerase (RNA) I polypeptide C (Polr1c), mRNA	0.45
MmEG-2870	NM_019550	polypyrimidine tract binding protein 2 (Ptbp2), mRNA	0.48
MmEG-2901	NM_011170	prion protein (Prnp), mRNA	0.49
MmEG-2908	NM_011072	profilin 1 (Pfn1), mRNA	0.37
MmEG-2916	NM_008831	prohibitin (Phb), mRNA	0.42
MmEG-2950	NM_001029855	proteasome (prosome, macropain) 28 subunit, beta (Psme2), transcript variant 2, mRNA	0.41
MmEG-2984	NM_013636	protein phosphatase 1, catalytic subunit, gamma isoform (Ppp1cc), mRNA	0.49
MmEG-3021	NM_172498	PTK2 protein tyrosine kinase 2 beta (Ptk2b), transcript variant 3, mRNA	0.31
MmEG-3023	NM_008989	purine rich element binding protein A (Pura), mRNA	0.44
MmEG-3035	NM_024221	pyruvate dehydrogenase (lipoamide) beta (Pdhb), mRNA	0.48
MmEG-3074	NM_025654	RAD52 motif 1 (Rdm1), mRNA	0.45
MmEG-3094	NM_009826	RB1-inducible coiled-coil 1 (Rb1cc1), mRNA	0.49
MmEG-3187	NM_009081	ribosomal protein L28 (Rpl28), mRNA	0.48
MmEG-3253	NM_009242	secreted acidic cysteine rich glycoprotein (Sparc), mRNA	0.44
MmEG-3260	NM_009263	secreted phosphoprotein 1 (Spp1), mRNA	0.42
MmEG-3284	NM_010891	septin 2 (Sept2), transcript variant 2, mRNA	0.42
MmEG-3324	NM_011314	serum amyloid A 2 (Saa2), mRNA	0.35
MmEG-3380	NM_033174	SNRPN upstream reading frame (Snurf), mRNA	0.47
MmEG-3382	NM_148938	solute carrier family 1 (glial high affinity glutamate transporter), member 3 (Slc1a3), mRNA	0.46
MmEG-3412	NM_133668	solute carrier family 25 (mitochondrial carrier, phosphate carrier), member 3 (Slc25a3), nuclear gene encoding mitochondrial protein, mRNA	0.46
MmEG-3523	NM_019641	stathmin 1 (Stmn1), mRNA	0.49
MmEG-3524	NM_009133	stathmin-like 3 (Stmn3), mRNA	0.49
MmEG-3527	NM_009128	stearoyl-Coenzyme A desaturase 2 (Scd2), mRNA	0.46
MmEG-3539	NM_011480	sterol regulatory element binding transcription factor 1 (Srebf1), mRNA	0.48
MmEG-3603	NM_016807	syndecan binding protein (Sdcbp), transcript variant 2, mRNA	0.47
MmEG-3659	NM_011595	tissue inhibitor of metalloproteinase 3 (Timp3), mRNA	0.3
MmEG-3705	NM_011528	transaldolase 1 (Taldo1), mRNA	0.49
MmEG-3717	NM_133977	transferrin (Trf), mRNA	0.46
MmEG-3787	NM_183017	tubulin tyrosine ligase-like family, member 12 (Ttll12), mRNA	0.47
MmEG-3836	NM_031202	tyrosinase-related protein 1 (Tyrp1), mRNA	0.38
MmEG-3846	NM_025407	ubiquinol-cytochrome c reductase core protein 1 (Uqcrc1), mRNA	0.49
MmEG-3847	NM_025710	ubiquinol-cytochrome c reductase, Rieske iron-sulfur polypeptide 1 (Uqcrfs1), mRNA	0.46
MmEG-3932	NM_011701	vimentin (Vim), mRNA	0.34
MmEG-3943	NM_011695	voltage-dependent anion channel 2 (Vdac2), mRNA	0.46
	SF and GC: spaceflight and ground control.
